# Supplementary material
Source: PubMed Central journal article supplement (PMC11470427)
Supplement: ijcep0017-0298-f5.pdf [file ijcep0017-0298-f5.pdf]

## STAT1 inhibits bladder cancer

**Supplementary Table 1.** List of primers for RT-qPCR

| Gene name | Primers of qPCR                                                      |
|-----------|----------------------------------------------------------------------|
| STAT1     | F: 5'-CAGCTTGACTCAAAATTCCTGGA-3'<br>R: 5'-TGAAGATTACGCTTGCTTTTCCT-3' |
| SOCS1     | F: 5'-GACGCCTGCGGATTCTAC-3'<br>R: 5'-AGCGGCCGGCCTGAAAG-3'            |
| SOCS3     | F: 5'-CTTTACCACCGACGGAACCT-3'<br>R: 5'-GAACTCCCGAATGGGTCCAG-3'       |
| GAPDH     | F: 5'-AGAAGGCTGGGCTCATTTG-3'<br>R: 5'-AGGGGCCATCCACAGTCTTC-3'        |

**Supplementary Table 2.** The sequence of STAT1 gene

| Gene name | Sequence (5'-3')                                                                                                                                                                                                                                                                                                                                                                                                                                                                                                                                                                                                                                                                                                                                                                                                                                                                                                                                                                                                                                                                                                                                                                                                                                                                                                                                                                                                                                                                                                                                                                                                                                                                                                                                                                                                                                                                                                                                                                                                                                                                                                                                                                                                                                                                                                                                                                                                                                                                                                           |
|-----------|----------------------------------------------------------------------------------------------------------------------------------------------------------------------------------------------------------------------------------------------------------------------------------------------------------------------------------------------------------------------------------------------------------------------------------------------------------------------------------------------------------------------------------------------------------------------------------------------------------------------------------------------------------------------------------------------------------------------------------------------------------------------------------------------------------------------------------------------------------------------------------------------------------------------------------------------------------------------------------------------------------------------------------------------------------------------------------------------------------------------------------------------------------------------------------------------------------------------------------------------------------------------------------------------------------------------------------------------------------------------------------------------------------------------------------------------------------------------------------------------------------------------------------------------------------------------------------------------------------------------------------------------------------------------------------------------------------------------------------------------------------------------------------------------------------------------------------------------------------------------------------------------------------------------------------------------------------------------------------------------------------------------------------------------------------------------------------------------------------------------------------------------------------------------------------------------------------------------------------------------------------------------------------------------------------------------------------------------------------------------------------------------------------------------------------------------------------------------------------------------------------------------------|
| STAT1     | CAGAGCTCGTTTAGTGAACCGTCAGATCGAATTCGCCACCATGTCTCAGTGGTACGAACTTCAGCAGCTT-<br>GACTCAAAATTCCTGGAGCAGGTTACCAGCTTTATGATGACAGTTTTCCCATGGAATCAGACAGTACCTG-<br>GCACAGTGGTTAGAAAAGCAAGACTGGGAGCACGCTGCCAATGATGTTTCATTTGCCACCATCCGTTTTCAT-<br>GACCTCCTGTACAGCTGGATGATCAATATAGTCGCTTTTCTTTGGAGAATAACTTCTTGCTACAGCATAACATA-<br>AGGAAAAGCAAGCGTAATCTTCAGGATAATTTTCAGGAAGACCCAATCCAGATGTCTATGATCATTTACAGCT-<br>GTCTGAAGGAAGAAAGGAAAATCTGGAAAACGCCAGAGATTTAATCAGGCTCAGTCGGGGAATATTACAGAG-<br>CACAGTGATGTTAGACAAAACAGAAAGAGCTTGACAGTAAAGTCAGAAATGTGAAGGACAAGGTTATGTGTATA-<br>GAGCATGAAATCAAGAGCCTGGAAGATTTACAAGATGAATATGACTTCAAATGCAAAACCTTGCAAGACAGAGAA-<br>CAGGAGACCAATGGTGTGGCAAAGAGTATCAGAAACAAGAACAGCTGTTACTCAAGAAGATGATTTAAT-<br>GCTTGACAATAAGAGAAAGGAAGTAGTTCCAAAAATAATAGAGTTGCTGAATGTCACTGAACCTACCCAGAAT-<br>GCCCTGATTAATGATGAACTAGTGGAGTGAAGCGGAGACAGCAGAGCGCCTGTATTGGGGGGCCGCCAAT-<br>GCTTGCTGGATCAGCTGCAGAACTGGTCACTATAGTTGCGGAGAGTCTGCAGCAAGTTCGGCAGCAGCT-<br>TAAAAAGTTGGAGGAATTGGAACAGAAATACACCTACGAACATGACCCTATCACAAAAACAACAAGTGT-<br>TATGGGACCGCACCTTCAGCTTTTCCAGCAGCTCATTAGAGCTCGTTTGTGGTGAAGACAGCCCTGCAT-<br>GCCAACGCACCCTCAGAGGCCGCTGTCTTGAAGACAGGGGTCCAGTTCAGTGTGAAGTTGAGAGATGT-<br>GAATGAGAGAAATACAGTAAAAGGATTTAGGAAGTTCAACATTTTGGGCACGCACACAAAAGTGATGAACATG-<br>GAGGAGTCCACCAATGGCAGTCTGGCGGTGAATTTCCGCACCTGCAATTGAAAGAACAGAAAAATGCTG-<br>GCACCAGAACAATGAGGGTCTCTCATCGTTACTGAAGAGCTTCACTCCCTAGTTTTGAAACCAATTGTGC-<br>CAGCCTGGTTTGGTAATTGACCTCGAGACGACCTCTCTGCCGTTGTGGTGATCTCCAACGTGAGCCAGCTCCC-<br>GAGCGTTGGGCCTCCATCCTTTGGTACAACATGCTGGTGGCGGAACCCAGGAATCTGTCCTTCTTCCT-<br>GACTCCACCATGTGCACGATGGGCTCAGCTTTTCAAGAAGTGTGAGTTGGCAGTTTTCTTCTGTCACCAAAAAGAG-<br>GTCTCAATGTGGACCAGCTGAACATGTTGGGAGAGAAGCTTCTTGGTCTAACGCCAGCCCCGATG-<br>GTCTCATTCCGTGGACGAGTTTTTGAAGGAAAATAAATGATAAAAATTTCCCTTCTGGCTTTGGATT-<br>GAAAGCATCCTAGAACTCATTAAAAAACCTGCTCCCTCTCTGGAATGATGGGTGCATCATGGGCTTCATCAG-<br>CAAGGAGCGAGAGCGTCCCTGTTGAAGGACCAGCAGCCGGGACCTTCTGCTGCGGTTCAAGTGAAGAGCTC-<br>CCGGAAGGGGCCATCACATTCATGAGGTGGAGCGTCCCAGAACGGAGGCGAACCTGACTTCCATGCG-<br>GTTGAACCTACACGAAGAAAGAAGTCTGCTGTTACTTTCCCTGACATCATTGCAATTACAAAGTCATGGCT-<br>GCTGAGAATATTCTGAGAATCCCTGAAGTATCTGTATCCAATATTGACAAAGACCATGCTTTGGAAAGTAT-<br>TACTCCAGGCCAAAGGAAGCACCAGAGCCAATGGAAGTGTGATGGCCCTAAAGGAACTGGATATATCAAGACT-<br>GAGTTGATTTCTGTGCTGAAGTTCACCCCTTAGACTTCAGACCACAGACAACCTGCTCCCATGCTCCTGAG-<br>GAGTTTGACGAGGTGTCTCGGATAGTGGGCTCTGTAGAATTCGACAGTATGATGAACACAGTAGAATTCGACTA-<br>CAAGGATGACGATGACAAGGATTACAAAGACGACGATGATAAGGACTATAAGGATGATGACGACAAAATAAGG |
